# Supplementary figures and images for: Identification of a Green Algal Strain Collected from the Sarno River Mouth (Gulf of Naples, Italy) and Its Exploitation for Heavy Metal Remediation
Source: MDPI journal article supplement (doi:10.3390/microorganisms10122445), 2022-12-10

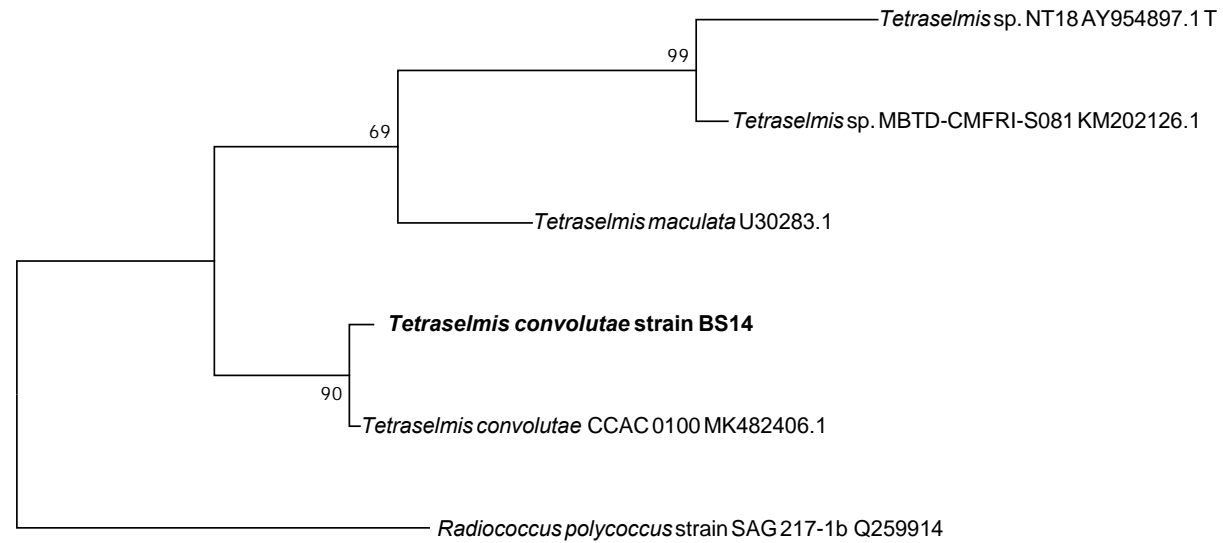

0.020

Supplement: s1 [file s1]
